# Supplementary material for: Optimizing 2-furylated imidazole π-bridges for NIR lipid droplet imaging
Source: Royal Society of Chemistry journal article supplement (doi:10.1039/d4cp02093f), 2024-01-01
Supplement: d4cp02093f1.pdf [file d4cp02093f1.pdf]

## Optimizing 2-Furylated Imidazole $\pi$ -Bridges for NIR Lipid Droplet Imaging

Anamika Suresh<sup>a</sup>, Rohith Ramasamy<sup>b</sup>, Deepa Kallumpurath<sup>a</sup>, Rajadurai Vijay Solomon<sup>b\*</sup>

<sup>a</sup>Department of Chemistry, R.S.M. SNDP Yogam College,

[Affiliated to the University of Calicut], Kozhikode – 673 305, Kerala, India

<sup>b</sup>Department of Chemistry, Madras Christian College (Autonomous), [Affiliated to the

University of Madras], Chennai – 600 059, Tamil Nadu, India

\*corresponding author: [vjsolo@gmail.com](mailto:vjsolo@gmail.com)

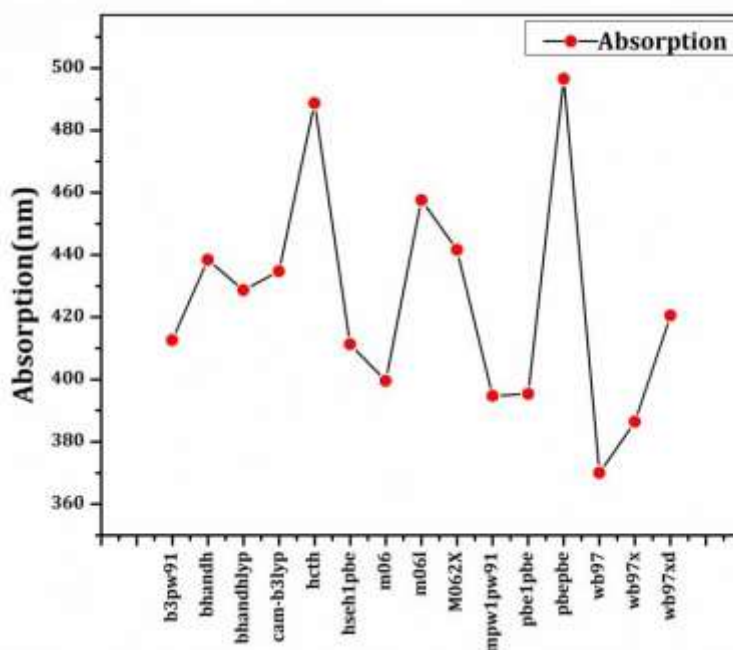

SIF1. Functional benchmarking at M06L/6-31+g(d)

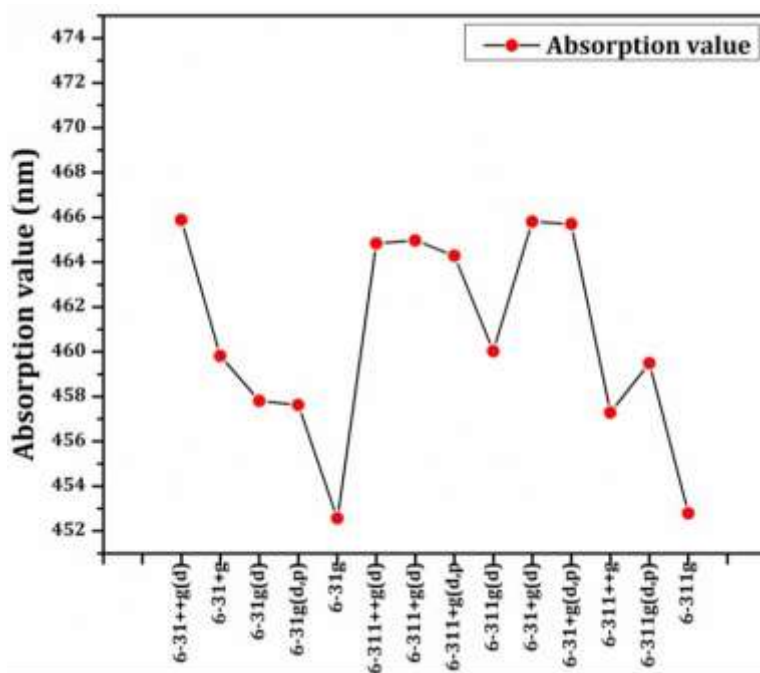

**SIF2.** Basis set bench marking M06L/6-31+g(d)

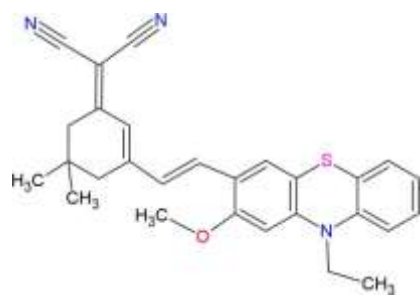

**LD**

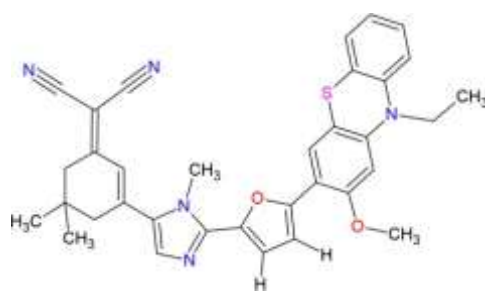

**LDP**

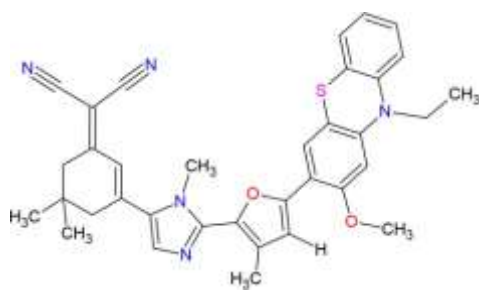

**LDP1**

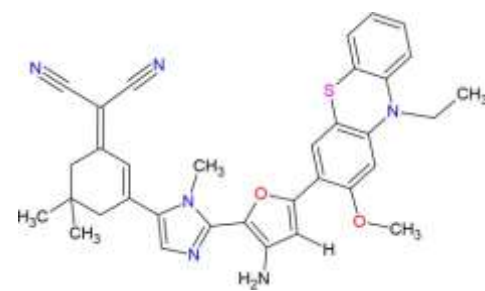

**LDP2**

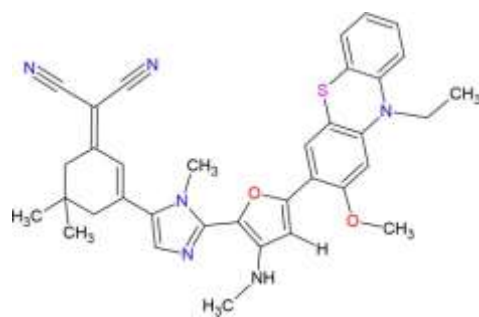

**LDP3**

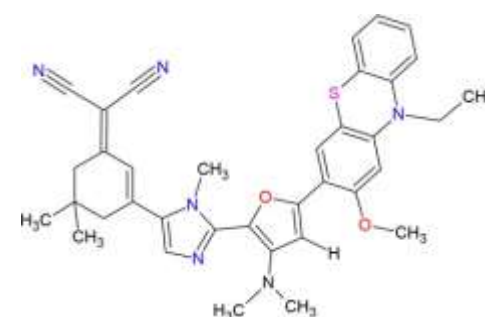

**LDP4**

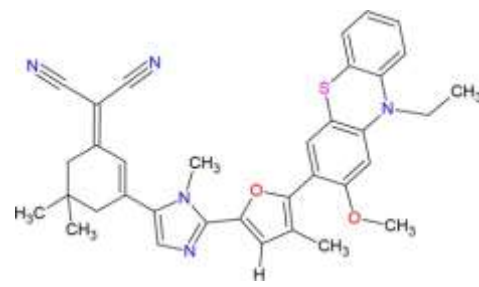

**LDP5**

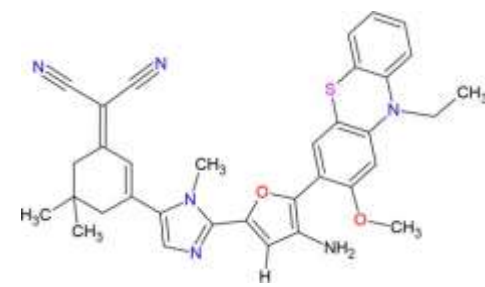

**LDP6**

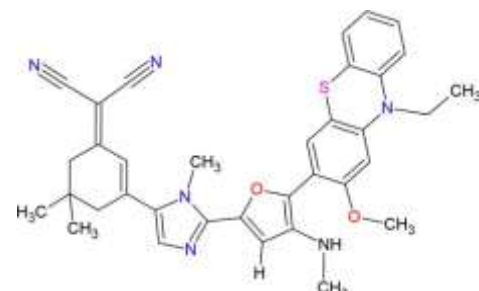

**LDP7**

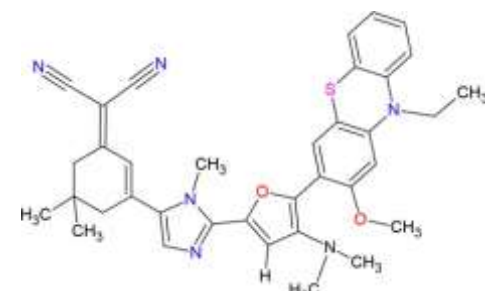

**LDP8**

**SIF3.** 2D structural representation of LD and LDPs

**SIT1.** Computed bond parameters of LD and LDPs at B3LYP/6-31+g(d) level of theory where length are in (Å) and bond angles given in °

| Molecules | Bond parameters |       |               |        |                        |         |
|-----------|-----------------|-------|---------------|--------|------------------------|---------|
|           | Bond length (Å) |       | Bond angle(°) |        | Bond dihedral angle(°) |         |
| LD        | C41-C36         | 1.443 | C3-C1-C25     | 124.16 | C3-C1-C25-C26          | -170.89 |
|           | C35-C29         | 1.427 | C2-C1-C25     | 116.04 | C2-C1-C25-C27          | -168.74 |
|           | C1-C25          | 1.446 | C36-C41-C42   | 117.39 | C27-C29-C35-C39        | -178.22 |
|           | C27-C31         | 1.359 | C36-C41-C43   | 126.71 | C30-C29-C35-C40        | -178.82 |
| LDP       | C41-C36         | 1.451 | C3-C1-C25     | 123.68 | C3-C1-C25-C26          | -154.17 |
|           | C35-C29         | 1.443 | C2-C1-C25     | 116.50 | C2-C1-C25-C27          | -159.02 |
|           | C1-C25          | 1.432 | C36-C41-C42   | 120.45 | C27-C29-C35-C39        | 167.54  |
|           | C27-C31         | 1.460 | C36-C41-C43   | 122.84 | C30-C29-C35-C40        | 165.58  |
|           |                 |       | C27-C29-C35   | 127.08 | C42-C41-C36-C37        | 176.18  |
|           |                 |       |               |        | C40-C36-C41-C43        | 176.69  |
| LDP1      | C41-C36         | 1.452 | C3-C1-C25     | 124.53 | C3-C1-C25-C26          | 159.69  |
|           | C35-C29         | 1.422 | C2-C1-C25     | 116.29 | C2-C1-C25-C27          | 169.58  |
|           | C1-C25          | 1.433 | C36-C41-C42   | 116.29 | C27-C29-C35-C39        | -174.76 |
|           | C27-C31         | 1.371 | C36-C41-C43   | 122.81 | C30-C29-C35-C40        | -170.77 |
|           |                 |       | C27-C29-C35   | 121.90 | C42-C41-C36-C37        | -170.77 |
|           |                 |       |               |        | C40-C36-C41-C43        | -174.76 |

|      |         |       |             |        |                 |         |
|------|---------|-------|-------------|--------|-----------------|---------|
| LDP2 | C41-C36 | 1.452 | C3-C1-C25   | 123.57 | C3-C1-C25-C26   | -154.00 |
|      | C35-C29 | 1.431 | C2-C1-C25   | 116.61 | C2-C1-C25-C27   | -159.37 |
|      | C1-C25  | 1.432 | C36-C41-C42 | 120.34 | C27-C29-C35-C39 | 177.50  |
|      | C27-C31 | 1.464 | C36-C41-C43 | 122.95 | C30-C29-C35-C40 | 177.94  |
|      |         |       | C27-C29-C35 | 126.25 | C42-C41-C36-C37 | 163.36  |
|      |         |       |             |        | C40-C36-C41-C43 | 160.56  |
| LDP3 | C41-C36 | 1.463 | C3-C1-C25   | 124.41 | C3-C1-C25-C26   | 158.15  |
|      | C35-C29 | 1.441 | C2-C1-C25   | 116.06 | C2-C1-C25-C27   | 167.67  |
|      | C1-C25  | 1.432 | C36-C41-C42 | 119.98 | C27-C29-C35-C39 | 135.84  |
|      | C27-C31 | 1.462 | C36-C41-C43 | 122.96 | C30-C29-C35-C40 | 137.57  |
|      |         |       | C27-C29-C35 | 127.11 | C42-C41-C36-C37 | 165.85  |
|      |         |       |             |        | C40-C36-C41-C43 | -169.26 |
| LDP4 | C41-C36 | 1.452 | C3-C1-C25   | 123.55 | C3-C1-C25-C26   | 152.76  |
|      | C35-C29 | 1.440 | C2-C1-C25   | 116.51 | C2-C1-C25-C27   | -157.72 |
|      | C1-C25  | 1.431 | C36-C41-C42 | 119.29 | C27-C29-C35-C39 | 137.74  |
|      | C27-C31 | 1.462 | C36-C41-C43 | 124.38 | C30-C29-C35-C40 | 141.39  |
|      |         |       | C27-C29-C35 | 120.38 | C42-C41-C36-C37 | 168.86  |
|      |         |       |             |        | C40-C36-C41-C43 | 169.72  |
| LDP5 | C41-C36 | 1.451 | C3-C1-C25   | 116.70 | C3-C1-C25-C26   | -155.65 |

|      |         |       |             |        |                 |         |
|------|---------|-------|-------------|--------|-----------------|---------|
|      | C35-C29 | 1.412 | C2-C1-C25   | 123.84 | C2-C1-C25-C27   | -161.65 |
|      | C1-C25  | 1.433 | C36-C41-C42 | 123.13 | C27-C29-C35-C39 | -178.08 |
|      | C27-C31 | 1.363 | C36-C41-C43 | 120.15 | C30-C29-C35-C40 | -177.86 |
|      |         |       | C27-C29-C35 | 120.36 | C42-C41-C36-C37 | 176.91  |
|      |         |       |             |        | C40-C36-C41-C43 | 172.40  |
| LDP6 | C41-C36 | 1.451 | C3-C1-C25   | 124.37 | C3-C1-C25-C26   | 157.50  |
|      | C35-C29 | 1.432 | C2-C1-C25   | 116.12 | C2-C1-C25-C27   | 167.43  |
|      | C1-C25  | 1.431 | C36-C41-C42 | 119.60 | C27-C29-C35-C39 | 143.69  |
|      | C27-C31 | 1.462 | C36-C41-C43 | 124.12 | C30-C29-C35-C40 | 148.84  |
|      |         |       | C27-C29-C35 | 127.19 | C42-C41-C36-C37 | -171.11 |
|      |         |       |             |        | C40-C36-C41-C43 | -167.02 |
| LDP7 | C41-C36 | 1.452 | C3-C1-C25   | 123.55 | C3-C1-C25-C26   | -153.73 |
|      | C35-C29 | 1.432 | C2-C1-C25   | 116.71 | C2-C1-C25-C27   | -160.16 |
|      | C1-C25  | 1.431 | C36-C41-C42 | 116.16 | C27-C29-C35-C39 | 175.48  |
|      | C27-C31 | 1.463 | C36-C41-C43 | 134.87 | C30-C29-C35-C40 | 177.61  |
|      |         |       | C27-C29-C35 | 125.27 | C42-C41-C36-C37 | 158.42  |
|      |         |       |             |        | C40-C36-C41-C43 | 162.07  |
| LDP8 | C41-C36 | 1.461 | C3-C1-C25   | 124.43 | C3-C1-C25-C26   | 157.93  |
|      | C35-C29 | 1.443 | C2-C1-C25   | 116.04 | C2-C1-C25-C27   | 167.46  |

|  |         |       |             |        |                 |         |
|--|---------|-------|-------------|--------|-----------------|---------|
|  | C1-C25  | 1.432 | C36-C41-C42 | 119.97 | C27-C29-C35-C39 | 126.83  |
|  | C27-C31 | 1.460 | C36-C41-C43 | 112.62 | C30-C29-C35-C40 | 128.98  |
|  |         |       | C27-C29-C35 | 127.25 | C42-C41-C36-C37 | -170.06 |
|  |         |       |             |        | C40-C36-C41-C43 | -166.76 |

**SIT2.** Weak interactions present in the LD and LDPs, where bond length are given in Å and bond angle given in degrees

| <b>Molecule</b> | <b>Interaction</b> | <b>Distance (Å)</b> | <b>Angle (°)</b> |
|-----------------|--------------------|---------------------|------------------|
| LD              | C29-H31 ---- O45   | 2.22                | 117.202          |
| LDP             | C31-H34 ---- O40   | 2.34                | 108.777          |
|                 | C37-H38 ---- O61   | 2.35                | 106.398          |
| LDP1            | C34-H37 ---- O39   | 2.35                | 106.265          |
|                 | C38-H40 ---- N44   | 3.09                | 74.383           |
|                 | C32-H33 ---- O63   | 2.36                | 106.123          |
| LDP2            | C37-H40 ---- O35   | 2.34                | 106.398          |
|                 | N41-H43 ---- N30   | 2.21                | 126.754          |
|                 | C33-H34 ---- O71   | 2.34                | 106.652          |
| LDP3            | C30-H33 ---- O40   | 2.35                | 110.160          |
|                 | N41-H42 ---- N39   | 2.19                | 127.918          |
|                 | C36-H37 ---- O65   | 2.35                | 108.906          |
| LDP4            | C37-H40 ---- O35   | 2.36                | 101.086          |
|                 | C46-H49 ---- N36   | 2.23                | 137.930          |
|                 | C32-H33 ---- O68   | 2.35                | 106.881          |
| LDP5            | C30-H33 ---- O39   | 2.36                | 106.906          |
|                 | C36-C41 ---- O63   | 2.89                | 81.390           |
| LDP6            | C36-H39 ---- O34   | 2.33                | 107.924          |
|                 | C40-H42 ---- O62   | 2.11                | 122.389          |
| LDP7            | C36-H39 ---- O34   | 2.38                | 105.427          |
|                 | N40-H41 ---- O64   | 1.99                | 140.144          |
| LDP8            | C-36-H39 ---- O34  | 2.34                | 109.127          |
|                 | C36-C41 ---- O63   | 2.89                | 81.390           |

**SIT3.** Calculated emission of LD and LDPs at M06L/6-31+g(d) level

| <b>Molecule</b> | $\lambda_{(\max)}$ <b>in nm</b> | $f_0$  | $E$ (eV) | <b>Assignment</b> |
|-----------------|---------------------------------|--------|----------|-------------------|
| LD              | 497.3                           | 0.0031 | 2.493    | HOMO-1→LUMO       |
| LDP             | 592.9                           | 0.364  | 2.091    | HOMO-1→LUMO       |
| LDP1            | 604.49                          | 0.348  | 2.051    | HOMO-1→LUMO       |
| LDP2            | 634.86                          | 0.555  | 1.953    | HOMO-1→LUMO       |
| LDP3            | 652.67                          | 0.566  | 1.900    | HOMO-1→LUMO       |
| LDP4            | 696.4                           | 0.327  | 1.780    | HOMO-1→LUMO       |
| LDP5            | 605.48                          | 0.349  | 2.048    | HOMO-1→LUMO       |
| LDP6            | 699.73                          | 0.207  | 1.772    | HOMO-1→LUMO       |
| LDP7            | 772.02                          | 0.150  | 1.606    | HOMO-1→LUMO       |
| LDP8            | 581.36                          | 0.356  | 2.133    | HOMO-1→LUMO       |

**SIT4.** Stokes shift values of LD and LDPs

| $\lambda_{(\text{emis})}$ <b>in nm</b> | $\lambda_{(\text{abs})}$ <b>in nm</b> | $\lambda_{(\text{abs})} - \lambda_{(\text{emis})}$ |
|----------------------------------------|---------------------------------------|----------------------------------------------------|
| 497.30                                 | 465.81                                | 1359.39                                            |
| 592.90                                 | 548.50                                | 1365.29                                            |
| 604.49                                 | 553.82                                | 1513.54                                            |
| 634.86                                 | 574.82                                | 1645.25                                            |
| 652.67                                 | 599.29                                | 1364.73                                            |
| 696.40                                 | 610.44                                | 2022.06                                            |
| 605.48                                 | 556.73                                | 1446.21                                            |
| 699.73                                 | 617.83                                | 1894.46                                            |
| 772.02                                 | 651.99                                | 2384.63                                            |
| 581.36                                 | 549.30                                | 1003.94                                            |

**SIT5.** Calculated absorption and emission of LD and LDPs at B3LYP/6-31+g(d) level

| <b>Molecule</b> | $\lambda_{(\text{abs})}$ <b>in nm</b> | $\lambda_{(\text{emis})}$ <b>in nm</b> |
|-----------------|---------------------------------------|----------------------------------------|
| LD              | 597.50                                | 454.38                                 |
| LDP             | 479.45                                | 525.58                                 |
| LDP1            | 610.60                                | 453.80                                 |
| LDP2            | 484.61                                | 532.61                                 |
| LDP3            | 488.09                                | 530                                    |
| LDP4            | 503                                   | 588.12                                 |
| LDP5            | 638.74                                | 783.34                                 |
| LDP6            | 702.64                                | 677.71                                 |
| LDP7            | 653.84                                | 601.79                                 |
| LDP8            | 487.09                                | 520.64                                 |



**SIT6.** Topological parameters of the weak interactions of LD and LDPs.

| <b>Molecules</b> | <b>Interactions</b> | <b><math>\rho</math></b> | <b><math>\nabla^2 \rho</math></b> | <b>V</b> | <b>G</b> | <b>Ellipticity</b> |
|------------------|---------------------|--------------------------|-----------------------------------|----------|----------|--------------------|
| LD               | C29-H31---O45       | 0.0171                   | 0.0646                            | -0.0209  | 0.0149   | 0.0456             |
| LDP              | C31-H34---O40       | 0.0140                   | 0.0554                            | -0.0105  | 0.0122   | 0.3314             |
|                  | C37--H38---O61      | 0.0138                   | 0.0559                            | -0.0104  | 0.0122   | 0.2771             |
| LDP1             | C32-H33-----O63     | 0.0136                   | 0.0549                            | -0.0102  | 0.012    | 0.2928             |
|                  | C34-H37---O39       | 0.0139                   | 0.056                             | -0.0104  | 0.0122   | 0.6633             |
|                  | C38-H40---N44       | 0.0084                   | 0.031                             | -0.0052  | 0.0065   | 0.6633             |
| LDP2             | C37-H40---O35       | 0.0134                   | 0.0531                            | -0.0100  | 0.011    | 0.2902             |
|                  | C33-H34---O71       | 0.0141                   | 0.0569                            | -0.0107  | 0.0125   | 0.2477             |
| LDP3             | C30-H33---O40       | 0.0131                   | 0.0524                            | -0.0099  | 0.0115   | 0.3045             |
|                  | C36-H37---O65       | 0.0139                   | 0.056                             | -0.0105  | 0.0122   | 0.2411             |
| LDP4             | C37-H40---O35       | 0.1477                   | 0.0607                            | -0.0111  | 0.0132   | 0.6893             |
|                  | C32-H33---O68       | 0.0138                   | 0.0557                            | -0.0104  | 0.0122   | 0.2461             |
|                  | C46-H49---N36       | 0.0182                   | 0.0588                            | -0.0126  | 0.0137   | 0.0652             |
| LDP5             | C36-H41---O63       | 0.0115                   | 0.0457                            | -0.0087  | 0.0101   | 0.6949             |
|                  | C30-H33---O39       | 0.1342                   | 0.0539                            | -0.0100  | 0.0118   | 0.6949             |
| LDP6             | C40-H42---O34       | 0.2000                   | 0.0734                            | -0.0173  | 0.0178   | 0.2334             |
|                  | C36-H39---O34       | 0.0141                   | 0.0562                            | -0.0106  | 0.0123   | 0.3814             |
| LDP7             | C36-O34---H39       | 0.0242                   | 0.0537                            | -0.0099  | 0.0117   | 0.4496             |
|                  | N40-H41---O64       | 0.0124                   | 0.0536                            | -0.0076  | 0.0105   | 1.1428             |
| LDP8             | C36-H39---O34       | 0.0136                   | 0.0543                            | -0.0102  | 0.0119   | 0.3164             |
|                  | C45-H48---O68       | 0.0136                   | 0.0543                            | -0.0102  | 0.0119   | 0.3164             |

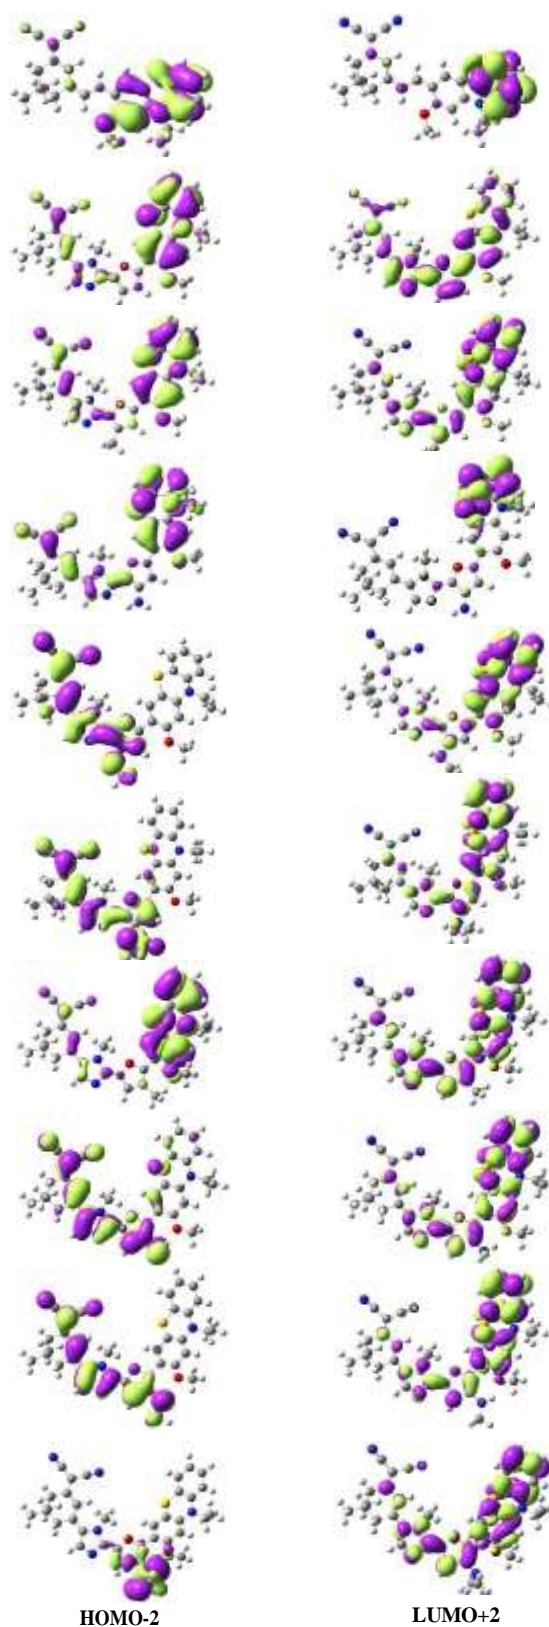

**SIF4.** The Frontier molecular orbitals (HOMO -2 and LUMO+2) of the LD and LDPs obtained from the optimized geometries at M06L/6-31+g(d) level of theory.

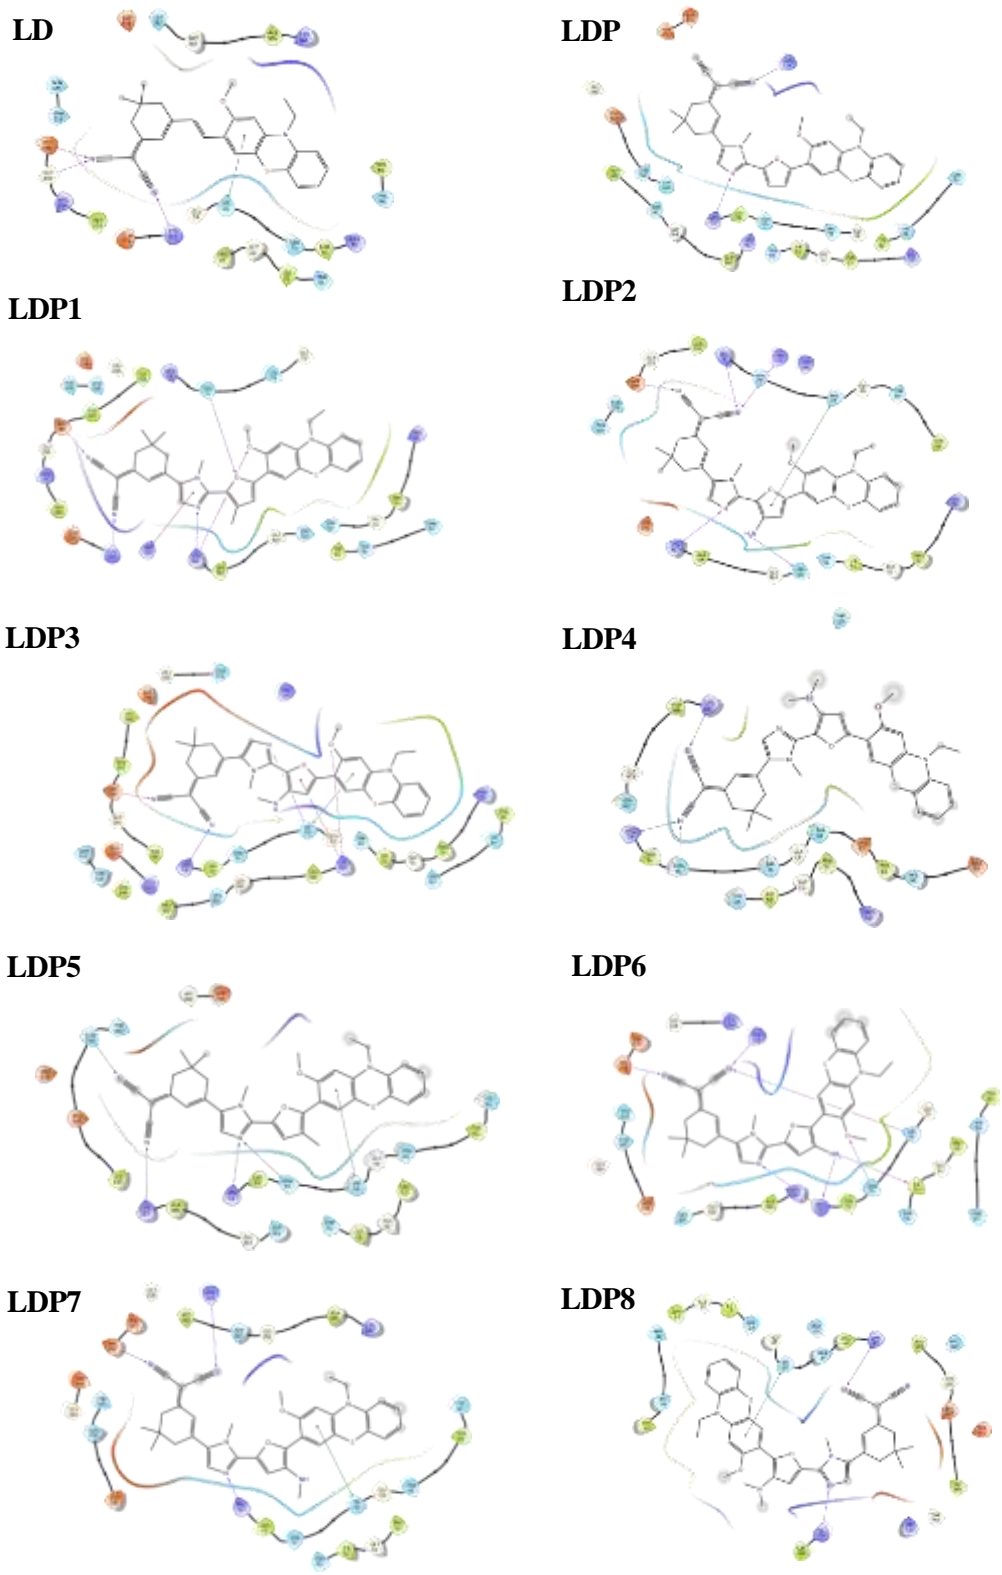

**SIF5.** 2D interaction plot of LD and LDPs with the human pyruvate kinase (PDB ID: 3GR4)

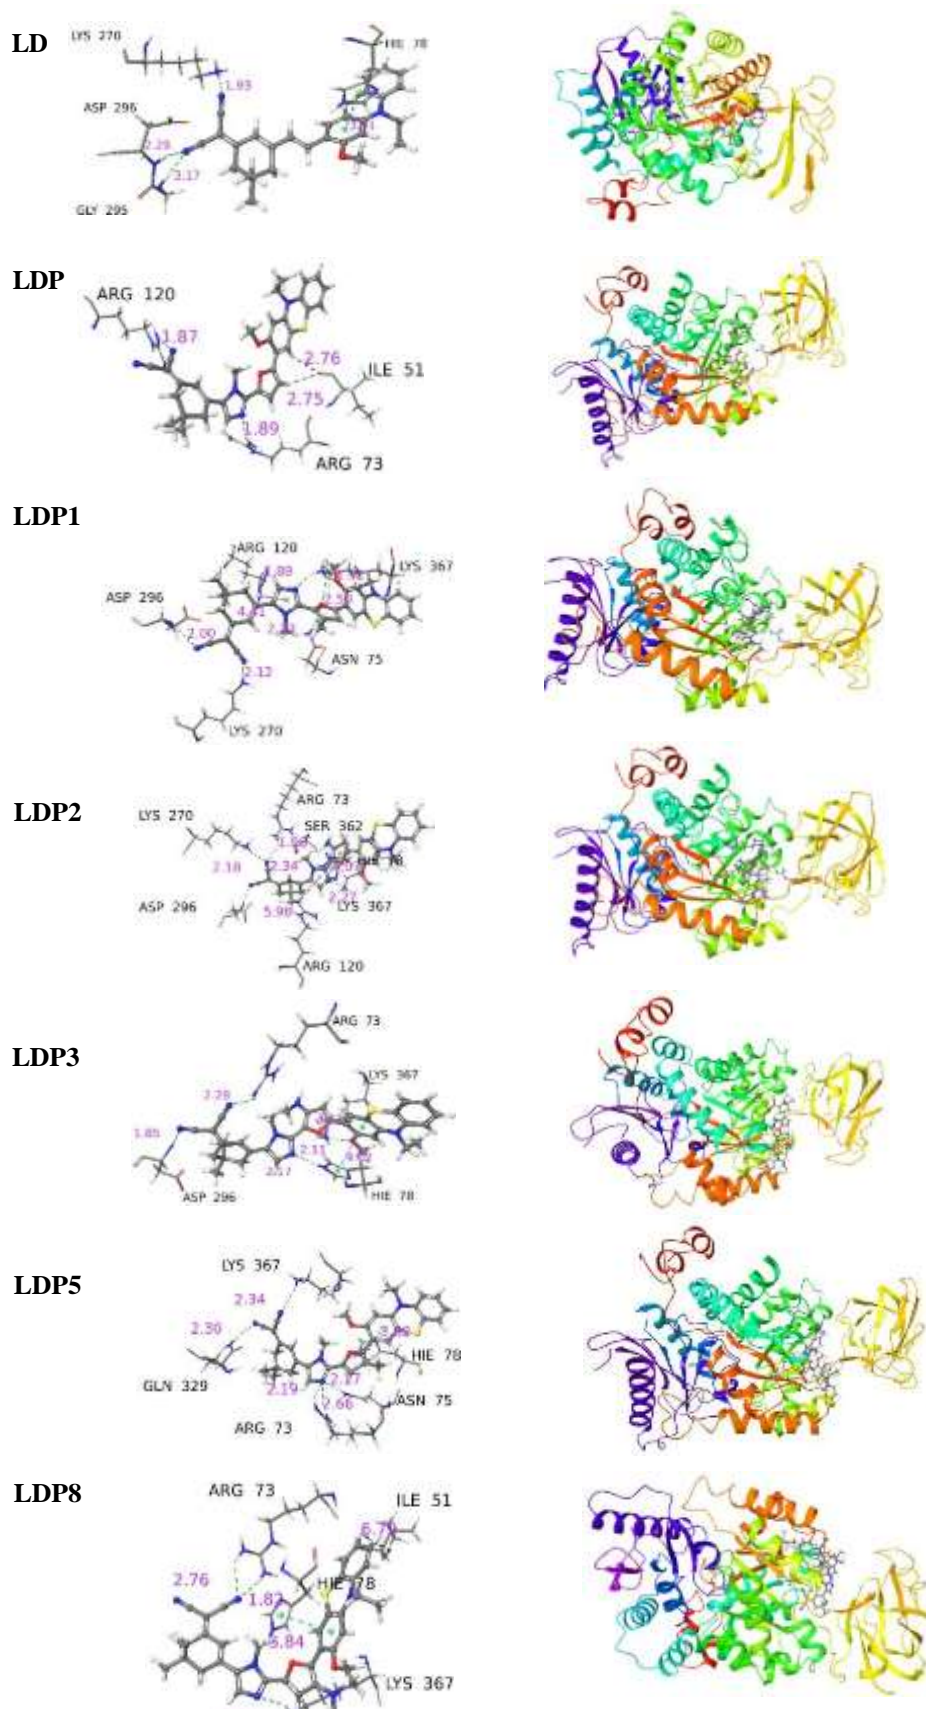

**SIF6.** 3D docked view of LD, LDP, LDP1, LDP2, LDP3, LDP5 and LDP8 with the human pyruvate kinase (PDB ID: 3GR4)
